# Supplementary material for: Effects of Embedded TiO2−x Nanoparticles on Triboelectric Nanogenerator Performance
Source: Micromachines (Basel). 2018 Aug 17;9(8):407. doi: 10.3390/mi9080407 (PMC6187469; doi:10.3390/mi9080407)
Supplement: Supplementary file 1 [file micromachines-09-00407-s001.pdf]

# Supplementary Materials: Effects of Embedded $\text{TiO}_{2-x}$ Nanoparticles on Triboelectric Nanogenerator Performance

Hyun-Woo Park, Nghia Dinh Huynh, Wook Kim, Hee Jae Hwang, Hyunmin Hong, KyuHyeong Choi, Aeran Song, Kwun-Bum Chung, and Dukhyun Choi

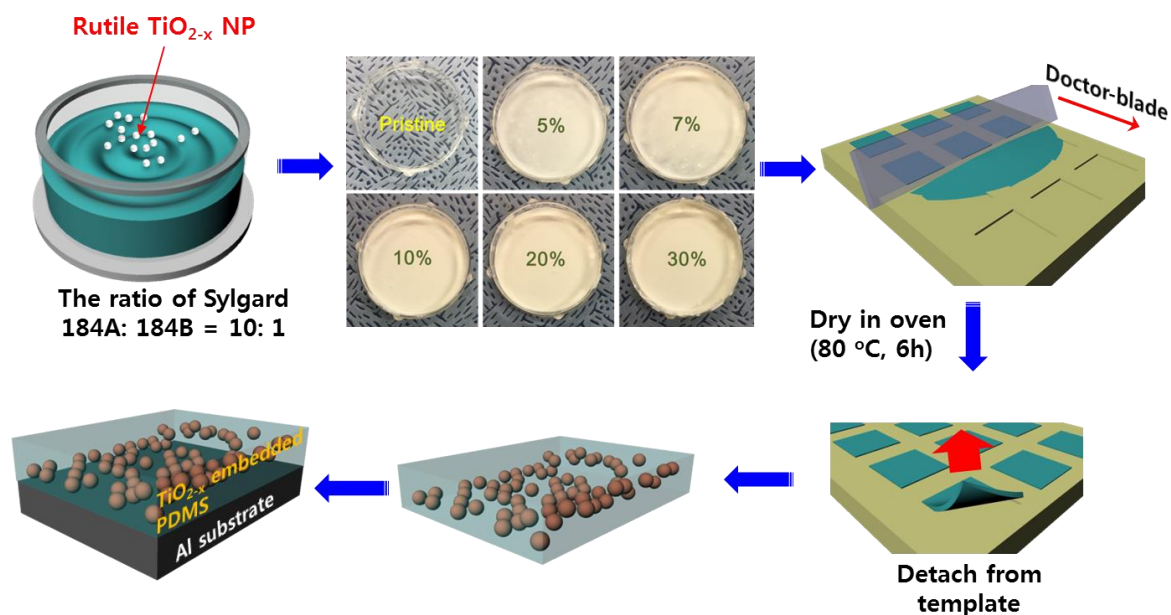

Figure S1. Schematic of the fabrication process for  $\text{TiO}_{2-x}$  NPs embedded TENG.

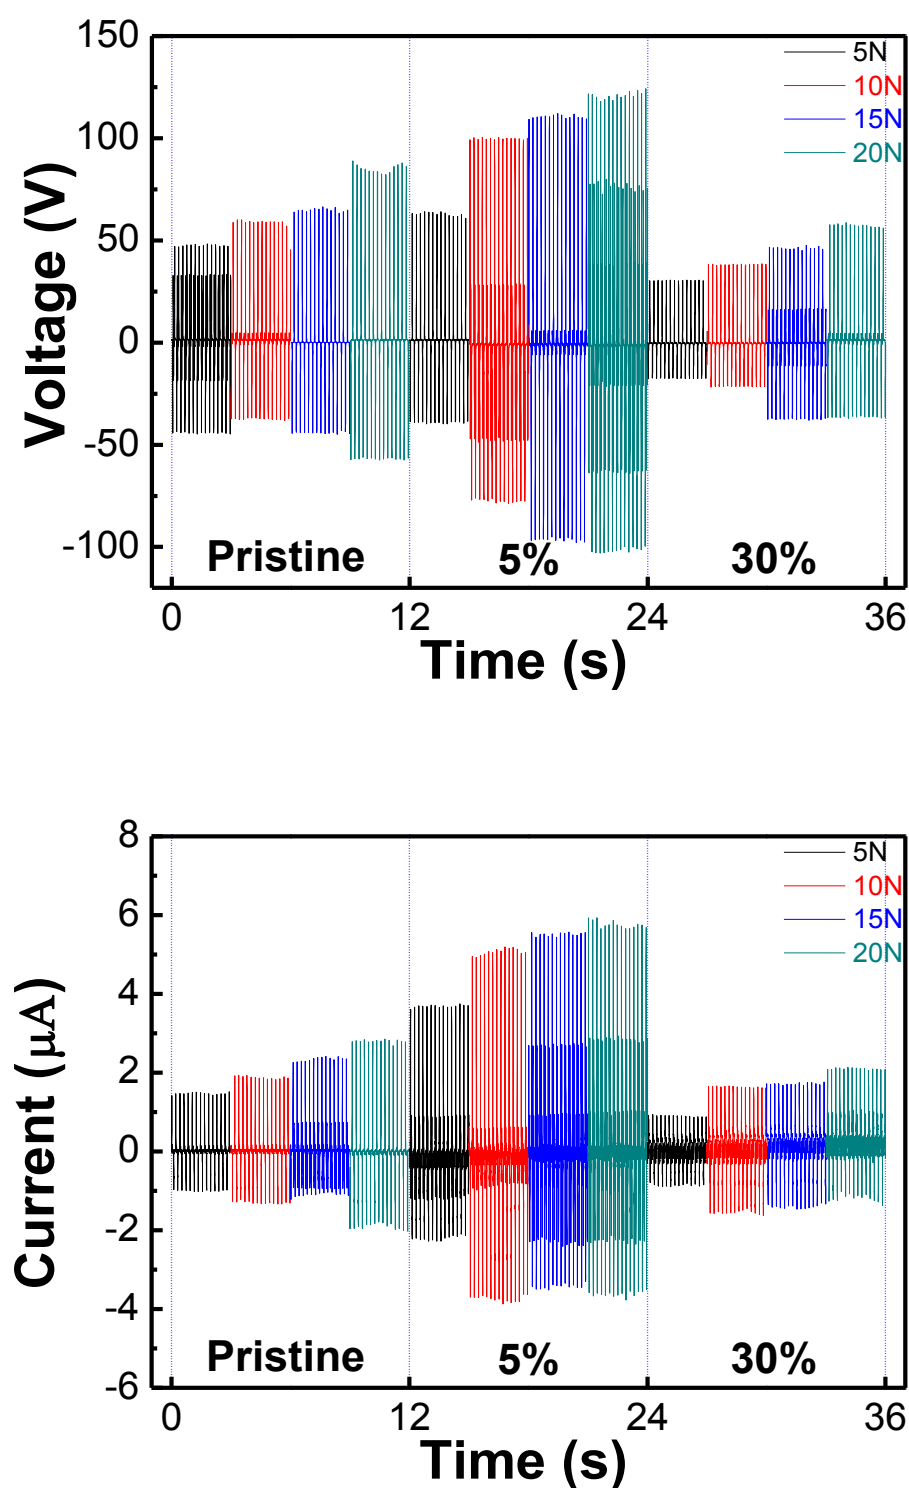

**Figure S2.** The voltage and current output performance of the  $\text{TiO}_{2-x}$  NPs-embedded PDMS based TENG with  $\text{TiO}_{2-x}$  NPs weight ratio of 0%, 5% and 30% at different applied forces ranging from 5 N to 20 N and pushing frequency of 5 Hz.

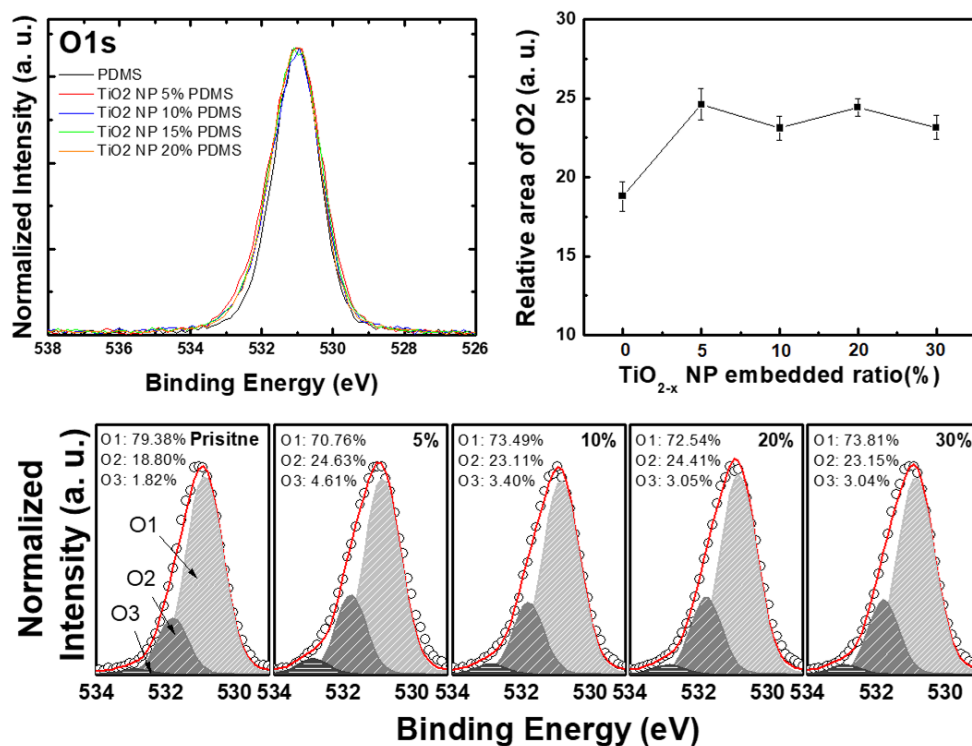

Figure S3. Change of oxygen deficient states with various TiO<sub>2-x</sub> NP concentrations.

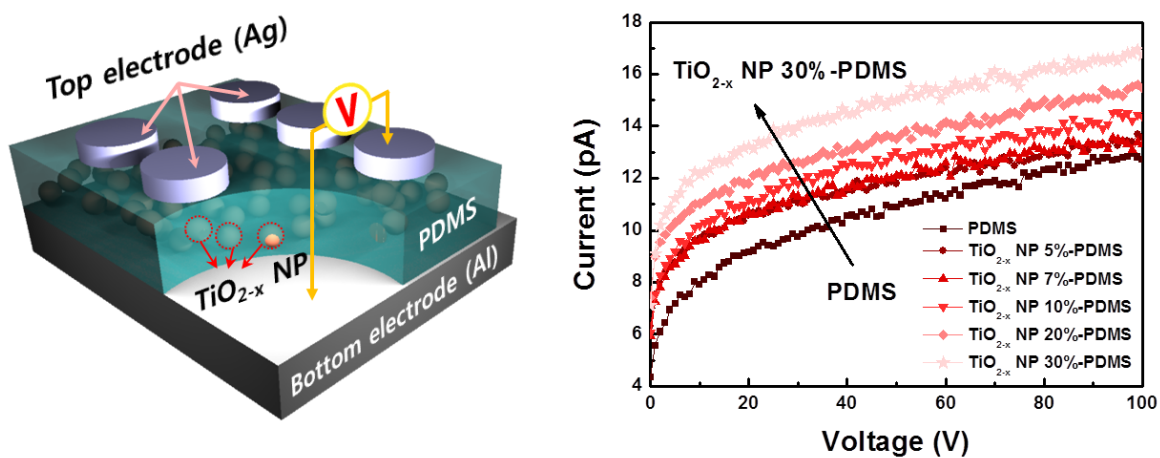

Figure S4. Leakage current characteristics of PDMS layer as a function of TiO<sub>2-x</sub> NPs embedded ratio.
